# Supplementary material
Source: Springer Nature journal article supplement (https://www.springermedizin.de/resource/supplementary/13045_2013_387_MOESM3_ESM.pdf/9661260)

pre-procedure  
March 2001

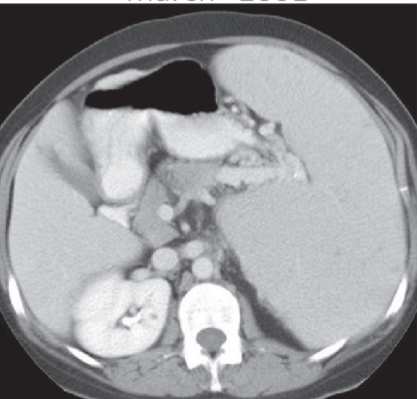

post-procedure  
May 2001

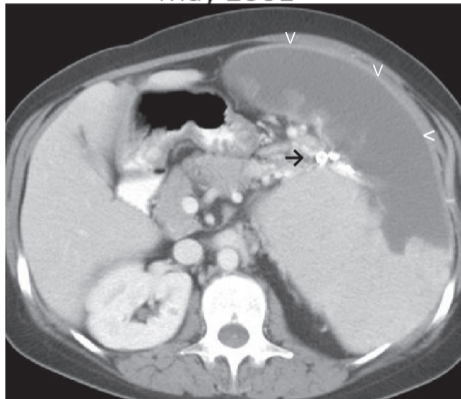

Supplement: MOESM3 [file 9661260]
